## Genome analysis

# Estimation of eosinophil cells in cord blood with references based on blood in adults via Bayesian measurement error modeling

Yu Jiang<sup>1</sup>, Hongmei Zhang <sup>1,\*</sup>, Shan V. Andrews<sup>2</sup>, Hasan Arshad<sup>3,4</sup>, Susan Ewart<sup>5</sup>, John W. Holloway <sup>6</sup>, M. Daniele Fallin<sup>7</sup>, Kelly M. Bakulski<sup>8</sup> and Wilfried Karmaus<sup>1</sup>

<sup>1</sup>Division of Epidemiology, Biostatistics and Environmental Health, School of Public Health, University of Memphis, Memphis, TN 38152, USA, <sup>2</sup>Department of Epidemiology, Bloomberg School of Public Health, Johns Hopkins University, Baltimore, MD 21205, USA, <sup>3</sup>Clinical and Experimental Sciences, Faculty of Medicine, University of Southampton, Southampton, SO16 6YD, UK, <sup>4</sup>David Hide Asthma and Allergy Research Centre, St Mary's Hospital, Newport, Isle of Wight, PO30 5TG, UK, <sup>5</sup>Department of Large Animal Clinical Sciences, Michigan State University, East Lansing, MI 48824, USA, <sup>6</sup>Human Development and Health, Faculty of Medicine, University of Southampton, Southampton, SO16 6YD, UK, <sup>7</sup>Department of Mental Health, Bloomberg School of Public Health, Johns Hopkins University, Baltimore, MD 21205, USA and <sup>8</sup>Department of Epidemiology, School of Public Health, University of Michigan, Ann Arbor, MI 48109, USA

\*To whom correspondence should be addressed.

Associate Editor: John Hancock

Received on January 22, 2019; revised on November 5, 2019; editorial decision on November 7, 2019; accepted on November 8, 2019

## Abstract

**Motivation:** Eosinophils are phagocytic white blood cells with a variety of roles in the immune system. In situations where actual counts are not available, high quality approximations of their cell proportions using indirect markers are critical.

**Results:** We develop a Bayesian measurement error model to estimate proportions of eosinophils in cord blood, using the cord blood DNA methylation profiles, based on markers of eosinophil cell heterogeneity in blood of adults. The proposed method can be directly extended to other cells across different reference panels. We demonstrate the method's estimation accuracy using B cells and show that the findings support the proposed approach. The method has been incorporated into the *estimateCellCounts* function in the *minfi* package to estimate eosinophil cells proportions in cord blood.

**Availability and implementation:** *estimateCellCounts* function is implemented and available in Bioconductor package *minfi*.

**Contact:** hzhang6@memphis.edu

**Supplementary information:** [Supplementary data](#) are available at *Bioinformatics* online.

## 1 Introduction

Eosinophils are white blood cells that perform a variety of functions, e.g. helping combat multicellular parasites and certain infections in vertebrates. Eosinophils are implicated in various diseases including asthma and allergy. The proportion of eosinophils relative to other cells in umbilical cord blood has the ability to predict respiratory illnesses in high risk infants (Berek, 2016; Junge *et al.*, 2014). It is important to correctly identify eosinophils and estimate their proportions in cord blood.

To estimate eosinophil counts in biological samples, cell counting is often needed. However, this is not feasible in many settings due to the low proportion of eosinophils in the blood, limitations of fresh cord blood samples and difficulty in discriminating eosinophils from other granulocytes (Ethier *et al.*, 2014). An indirect method for estimating cell compositions, which uses DNA methylation (DNAm) profiles to infer cell proportions, has been developed

(Houseman *et al.*, 2015) and incorporated into an R package *minfi*. This approach estimates eosinophil proportions in peripheral blood in adults. However, estimation bias is noted when the method is applied to samples collected from cord blood or other tissues due to the lack of eosinophil-specific reference data (Aryee *et al.*, 2014). We develop a Bayesian measurement error model aiming to correct the bias in the estimation of eosinophil cell proportions in cord blood when using a reference database based on blood in adults.

## 2 Materials and Methods

Let  $n$  denote the number of cord blood samples and  $p_i$  be an estimated cell proportion of eosinophils using an incorrect reference profile, e.g. determined based on peripheral blood in adults, for the  $i$ th sample,  $i = 1, 2, \dots, n$ . For the purpose of model fitting, we apply

logit transformation to  $p_i$ ,  $y_i = \log(p_i/(1-p_i))$ . Let  $\mu_i$  be the cell proportion of eosinophils in cord blood for sample  $i$ , inferred based on the correct reference data from cord blood samples. We define the following measurement error model:

$$y_i = \mu_i + v + \varepsilon_i, \quad (1)$$

where  $v$  is the size of systematic error and  $\varepsilon_i \sim N(0, \sigma^2)$ . The parameter  $\sigma^2$  determines the size of measurement error at the individual level. We assume that the prior distribution of  $\sigma^2$  is a uniform distribution with lower and upper bounds  $a$  and  $b$ , respectively. The values of  $a$  and  $b$  need to be pre-specified (Supplementary Section S2). For  $\mu_i$ , we choose a flat prior distribution,  $\mu_i \sim N(0, s^2)$ , with variance  $s^2$  large and known. In the current study, we set  $s^2 = 10^4$ . The prior distribution of systemic error  $v$  is assumed to be normally distributed,  $N(c, d^2)$ , with  $c$  and  $d^2$  known and determined based on data from six existing studies (Supplementary Sections S2 and S3). We use the Gibbs sampler to estimate all the unknown parameters: (i) sampling the conditional posterior distribution of  $\mu_i$ , conditional on data and other parameters (denoted as 'rest'),  $\mu_i | \text{rest} \sim N\left(\frac{1}{\sigma^2} \left(\frac{y_i - v}{\frac{1}{s^2} + 1}, \frac{1}{\frac{1}{s^2} + 1}\right)\right)$ , (ii)

sampling the conditional posterior distribution of  $v$ ,  $v | \text{rest} \sim N\left(\frac{d^2 \sum_{i=1}^n (y_i - \mu_i) + c\sigma^2}{nd^2 + \sigma^2}, \frac{\sigma^2 d^2}{nd^2 + \sigma^2}\right)$  and (iii) sampling the conditional posterior distribution of  $\sigma^2$ ,  $\frac{1}{\sigma^2} | \text{rest} \sim \text{truncated Gamma}(\alpha, \beta)$ , with  $\alpha = \frac{n-1}{2}$  and  $\beta = \sum_{i=1}^n (y_i - \mu_i - v)^2 / 2$ , with  $a \leq \sigma^2 \leq b$ .

As noted earlier,  $\sigma^2$  and  $v$  determine the size of measurement errors. Thus, the choice of prior parameters  $a$ ,  $b$ ,  $c$  and  $d$  is critical and should reasonably represent the range of errors. We select these parameters utilizing cell types that have both cord and adult blood references available. Here, we briefly discuss the approach used to specify the four parameters and the details are in Supplementary Section S2. In the selection of parameters  $a$  and  $b$ , using the existing method available in the *minfi* package (in the function *estimateCellCounts*), we are able to infer the cell type proportions for each sample using the reference profiles constructed based on cord blood (this gives  $\mu_i$  for a cell) as well as the proportions via reference profiles based on blood in adults (this gives  $y_i$  for that cell). Consequently, we are able to estimate the magnitude of measurement errors of each sample for each of the six cell types (by calculating the differences between  $y_i$  and  $\mu_i$ ). These measurement errors are then used to determine the values of  $a$  and  $b$  in the prior distribution of  $\sigma^2$ . To specify the prior parameters  $c$  and  $d$  objectively and informatively, we implement two strategies. When inferring  $a$  and  $b$ , we use information on cells in the same or a similar category to eosinophils, which potentially increases the accuracy of inferred systematic error. Granulocytes are selected for this purpose since eosinophilic cells are a subset of this cell type. In addition, taking into account that systematic errors may vary between studies, we summarize measurement errors inferred from six independent studies.

To demonstrate the effectiveness of the proposed method, we use B cells and assess the accuracy of the estimated B cell proportions in six studies (Supplementary Section S3). We also examine the impact of different prior distributions of  $v$  on the inference of cell proportions (Supplementary Section S4). The results show that using the proposed informative prior distributions improves the estimated cell proportions; it gives smaller mean squared errors and estimation bias compared to alternative priors, informative or none-informative.

### 3 Illustration of the R function for cell proportion estimation with correction

We have incorporated the Bayesian method for estimating cell proportions into the *estimateCellCounts* function in the *minfi* package. As shown in Fig. 1, the entire Bayesian estimation model and computation is in the background. The format of input data and output of the updated *estimateCellCounts* function are similar to the format of its previous version. It takes DNAm data in the format of a *RGChannelSet* as the input data and returns cell counts for all samples. To estimate the proportion of eosinophils, users should ensure

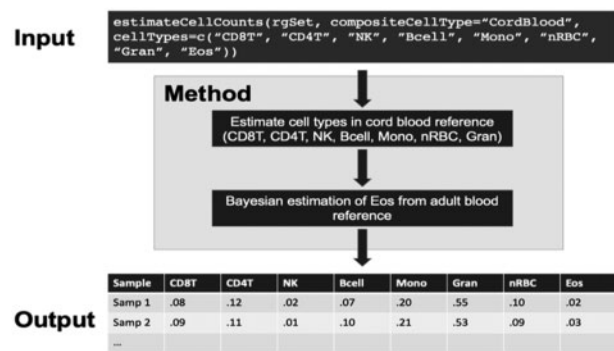

Fig. 1. Flowchart of Eos cell proportion estimation in cord blood using *estimateCellCounts* function in *minfi* packages

that the *cellTypes* option includes 'Eos', and the *compositeCellType* is defined as 'CordBlood'. The arguments in the *estimateCellCounts* function are specified as follows:

```
estimateCellCounts(rgSet, compositeCellType = 'CordBlood',
cellTypes = c('CD8T', 'CD4T', 'NK', 'Bcell', 'Mono', 'nRBC',
'Gran', 'Eos').
```

### 4 Summary

The proposed method has been built into the *estimateCellCounts* function in the *minfi* package. The use of the function is the same as that for the default cord blood *estimateCellCounts* function except that 'Eos' needs to be specified in the *cellTypes* vector in order to infer its cell proportions. The added computational time is only 1.6 s (0.8% of total running time of *estimateCellCounts*) with the inclusion of the Bayesian measurement error modeling for an analysis of 70 samples. The current measurement error model is developed for the estimation of eosinophil cells. However, it is not restricted to this cell and can be directly applied to estimate proportions of other cell types as long as the cell has information in one reference database. In addition, the proposed method is not restricted to cells in cord blood. It can be extended to whole blood or other tissues when reference data are not available.

### Acknowledgements

We are thankful to the computation support from the High Performance Computing facility at the University of Memphis.

### Funding

National Institutes of Health (NIH) R01A1121226 (PIs: Zhang, Holloway), R01HL132321 and R03HD092776 (PI: Karmaus), the start-up funds for Dr. Jiang from the School of Public Health at the University of Memphis. Dr. Bakulski is supported by the NIH R01AG055406 (PIs: Bakulski, Ware), P30ES017885 (PI: Loch-Carus), R01ES025531 (PI: Fallin) and R01ES025574 (PI: Schmidt).

*Conflict of Interest:* none declared.

### References

- Aryee, M.J. et al. (2014) *Minfi*: a flexible and comprehensive bioconductor package for the analysis of Infinium DNA methylation microarrays. *Bioinformatics*, 30, 1363–1369.
- Berek, C. (2016) Eosinophils: important players in humoral immunity. *Clin. Exp. Immunol.*, 183, 57–64.
- Ethier, C. et al. (2014) Identification of human eosinophils in whole blood by flow cytometry. *Methods Mol. Biol.*, 1178, 81–92.
- Houseman, E.A. et al. (2015) DNA methylation in whole blood: uses and challenges. *Curr. Environ. Health Rep.*, 2, 145–154.
- Junge, K.M. et al. (2014) The LINA cohort: cord blood eosinophil/basophil progenitors predict respiratory outcomes in early infancy. *Clin. Immunol.*, 152, 68–76.
